# Supplementary material
Source: ML conference proceedings conference paper supplement (https://proceedings.neurips.cc/paper_files/paper/2024/hash/96271227d3e204501d199433e56af289-Abstract.html)
Supplement: Supplementary file 1 [file 96271227d3e204501d199433e56af289-Supplemental-Datasets_and_Benchmarks_Track.pdf]

## A Appendix

### A.1 UniBench Implementation Details

We have developed UniBench to be easy-to-run library to allow researchers to systematically compare and contrast existing (n=59 ) and new VLMs on 53 benchmarks. To evaluate new VLMs that expand beyond the already implemented 59 VLMs, users need to follow Code Snippet 2. Users would need to create a class that inherit from ClipModel from uni\_bench.models\_zoo with get\_image\_embeddings and get\_text\_embeddings methods implemented. get\_image\_embeddings and get\_text\_embeddings methods takes images and captions as input, respectively, and returns a tensor of encoded representations.

```
1 from unibench.models_zoo import ClipModel
2 import unibench
3
4 class CustomModel(ClipModel):
5
6     @torch.no_grad()
7     # Output tensor of final layer of image encoder
8     def get_image_embeddings(self, images):
9         ...
10
11    @torch.no_grad()
12    # Output tensor of final layer of text encoder given captions
13    def get_text_embeddings(self, captions):
14        ...
15
16
17 evaluator = unibench.Evaluator() # Initialize Evaluator class
18 new_model = CustomModel() # Initialize new model
19 evaluator.add_model(new_model) # add new model to the evaluation
20 evaluator.evaluate() # run the evaluation
```

Code Snippet 2: Custom Model Example

### A.2 Natural Language Output Models on UniBench

As described in Section 2.2, LLM-style models defined as models that generate tokens/text as output. Thereby, making them hard to compare with CLIP-style VLMs. In UniBench, we also incorporated LLM-style models in a control experiments. While, LLM-style benchmarks are not suitable for evaluating CLIP-like VLMs, benchmarks in UniBench are capable of testing both LLM and CLIP style models. Following Matsuura et al. [2023] methodology, we evaluated Llava 1.5 [Liu et al., 2023] - a LLM-style VLM - on various benchmark types in UniBench (Table 2). In Table 2, we evaluated 7 and 13 billion scales of Llava.

| Model Name                       | Corruption | Non-natural Images | Object Recognition | Reasoning | Relation | Robustness | Texture |
|----------------------------------|------------|--------------------|--------------------|-----------|----------|------------|---------|
| Llava 1.5 13B [Liu et al., 2023] | 31         | 50                 | 36                 | 11        | 41       | 24         | 34      |
| Llava 1.5 7B [Liu et al., 2023]  | 29         | 51                 | 32                 | 12        | 42       | 23         | 28      |

Table 2: Performance (%) of Llava 1.5 on different Benchmark types.

### A.3 Gauging progress in Vision Language Models

**Scaling improves many benchmarks, but offers little benefit for reasoning and relation.** Appendix Figure 7 shows that despite increasing the training dataset size by a factor of 1000× and model size by a factor of 11×, relational and reasoning benchmarks performance is fairly flat compared to the significant boost in performance on other tasks. We further pinpoint capabilities such as Depth Estimation, Spatial Understanding, Counting, Scene and Text Recognition, as the underlying capabilities where scale does not lead to improvements as shown in Figure 8.

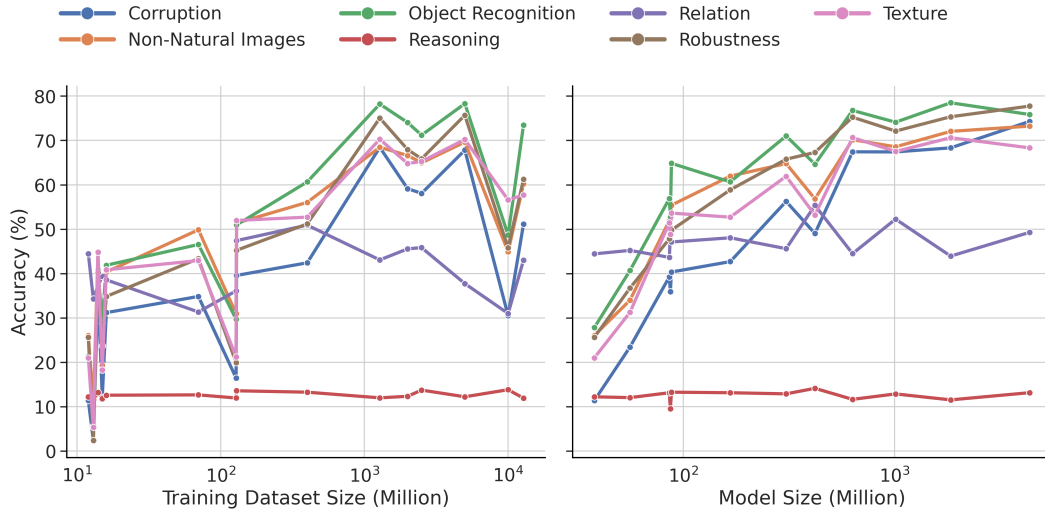

Figure 7: **The effect of scaling model and training dataset size on all models.** Median zero-shot performance of models on various benchmark types. We investigate the impact of training dataset size (left), and model size on various benchmark types (right).

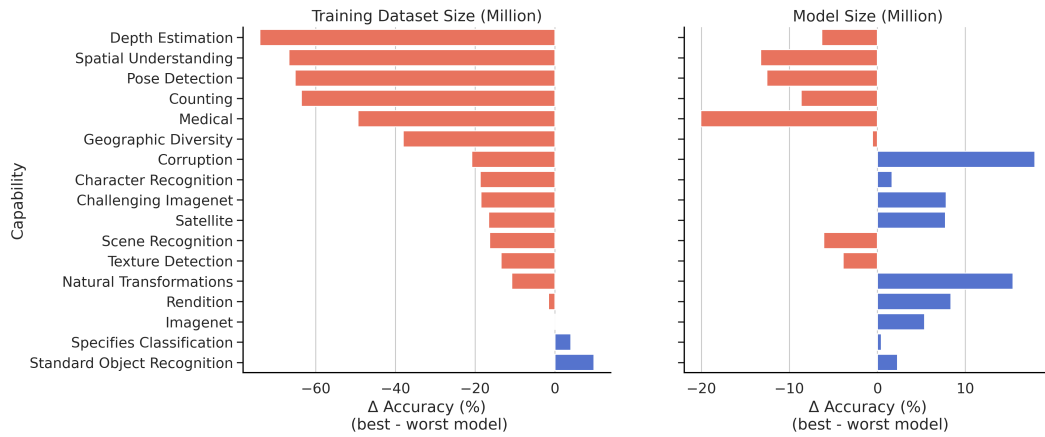

Figure 8: **Benchmark capabilities performance does not scale with dataset and model size** Median zero-shot performance of models on various benchmark capabilities. We investigate the impact of dataset size (left), and model size on various benchmark capabilities (right). We isolate the effect of training data size keeping other factors such as architecture, learning objective, and model size fixed only using ViT B32 (left). For right panel subfigure, we isolate the effect of model size keeping other factors such as architecture, learning objective, and training data size fixed only using LIAON 400M (right).

## A.4 Impact of Prompts on MNIST Performance

The MNIST benchmark, featuring handwritten digits, was subjected to various prompting strategies to evaluate their impact on model performance. Our findings reveal a distinct hierarchy in performance based on the type of prompts used. The benchmark was tested with both numeral formats ("zero-nine" and "0-9") and different prompt styles (specialized word prompts, specialized digit prompts, and a basic prompt) (Figure 9).

### A.4.1 Hierarchy of Prompt Performance

The performance of the MNIST model varied significantly across different prompt types and formats, arranged here from best to worst performing setups: 1. Word digits ("zero-nine") with specialized word prompts 2. Word digits ("zero-nine") with basic prompt 3. Word digits ("zero-nine") with specialized digit prompts 4. Digits ("0-9") with specialized digit prompts 5. Digits ("0-9") with basic prompt 6. Digits ("0-9") with specialized word prompts

### A.4.2 Specialized Word Prompts

These prompts provided detailed descriptions and contexts, significantly enhancing the model's ability to recognize and interpret the digits accurately. Examples include:

- "showcasing the digit {}, is this image."
- "this number {} is represented in a handwritten form."
- "the numeral {} is captured in this snapshot."
- "the digit {} is depicted visually in this image."
- "this image is a graphical representation of the number {}."
- "this is an illustration of the digit {}."
- "this image represents the digit {} in a handwritten form."
- "the number {} is sketched as a digit in this image."
- "this is a photograph of the digit {}."
- "the number {} is drawn as a digit in this image."

### A.4.3 Specialized Digit Prompts

These prompts explicitly mention the format or style of the digit, aiding in recognition but to a lesser extent compared to specialized word prompts. Examples include:

- "A photo of the number: '{}'. "
- "A digit drawing of the number: '{}'. "
- "A digit sketch of the number: '{}'. "
- "A handwritten digit image of: '{}'. "
- "A digit illustration of: '{}'. "
- "A graphical representation of the number: '{}'. "
- "A visual depiction of the digit: '{}'. "
- "A snapshot of the numeral: '{}'. "
- "A handwritten representation of the number: '{}'. "
- "An image showcasing the digit: '{}'. "

### A.4.4 Basic Prompt

The basic prompt used:

- "a photo of the number: '{}'. "

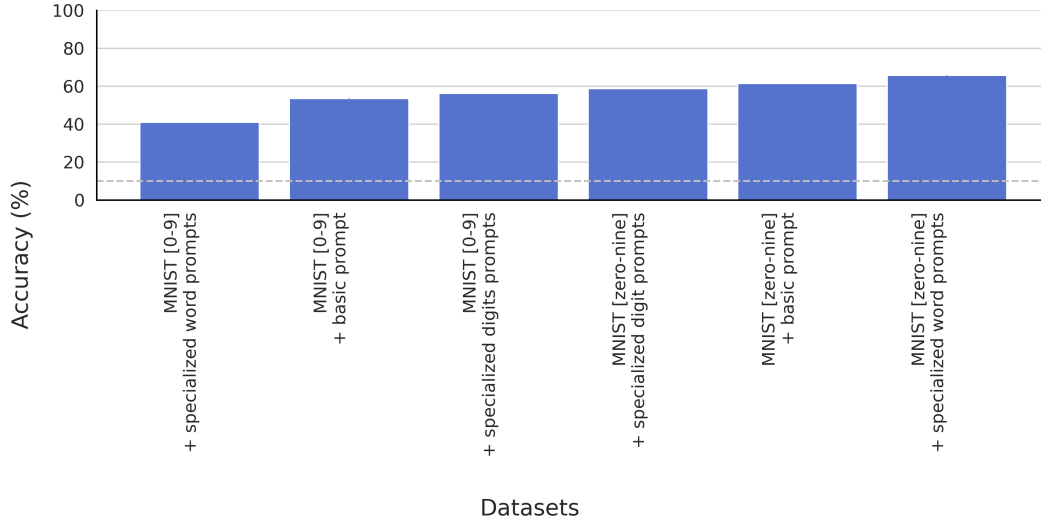

Figure 9: **Median performance of 59 VLMs on MNIST while varying prompts and labels.** Blue bars represent the median zero-shot performance of models and dashed-grey line represents the chance-level for MNIST.

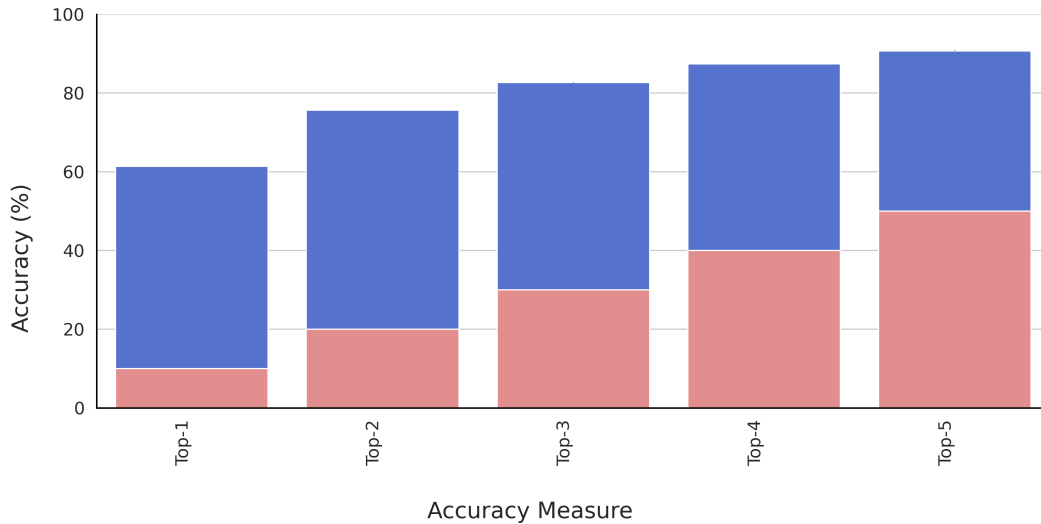

Figure 10: **Median performance of 59 VLMs on MNIST while varying accuracy measure from top-1 to top-5.** The following further shows that VLMs’ performance on MNIST is not due mismatch between top-1 and top-5 guesses. Blue bars represent the median zero-shot performance of models and red bars represents the chance-level for benchmarks.

This structured analysis clearly demonstrates how the specificity and relevance of the prompt significantly influence the performance of VLMs. We investigated whether the subpar performance could be attributed to a lack of training images containing digit concepts by analyzing the popular LAION 400M dataset. Our findings reveal a substantial number of captions with both word digits (100k-2M) and integer digits (15M-48M) in the training captions, suggesting that the poor performance is not merely due to insufficient training data (see Figure 11 for exact counts by digit). To further understand the performance results on MNIST, we compute more generous top-2,-3,-4, and -5 accuracy measures to understand whether models confuse similar digits. We show in Appendix Figure 10 that even when we compute top-5 accuracy (with 50% being chance), VLMs barely reach 90% accuracy suggesting poor performance is not due to minor confusions among digits.

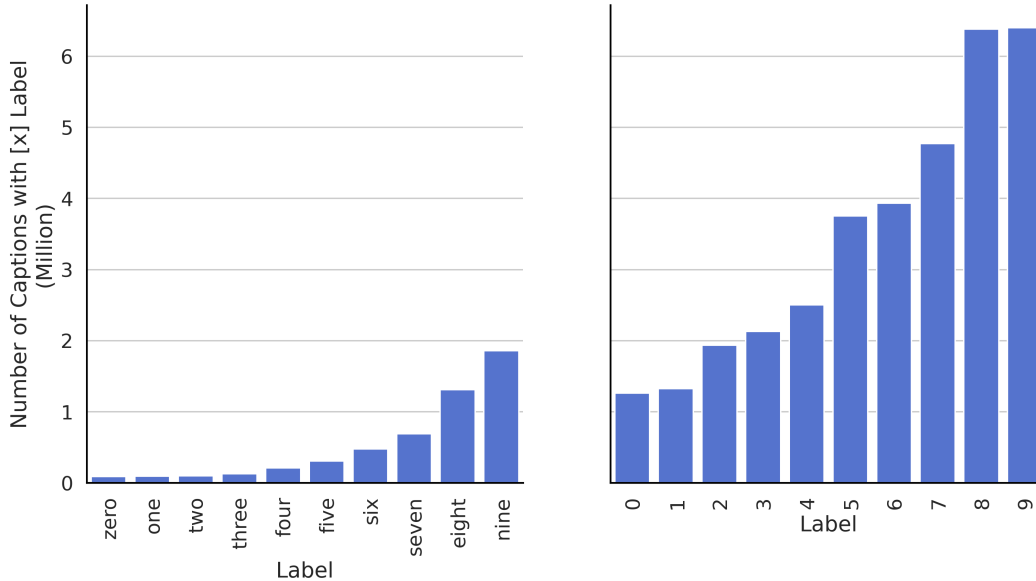

Figure 11: **Frequency of different digits in LAION-400M, showing substantial frequency of digits in visual diet of VLMs.** Left panel counts the number of words of the digits i.e. [zero-nine] and right panel counts the number of digits in LAION-400M.

### A.5 Correlation of ImageNet with Other Benchmarks

ImageNet, often considered a cornerstone in the field of computer vision, has been widely used as a benchmark to evaluate the performance of image recognition models. Its extensive dataset and challenging classification tasks have set a standard for algorithm development and comparison. However, while ImageNet correlates well with many benchmarks, it does not exhibit a universal correlation across all tasks. Our analysis reveals that for a significant number of benchmarks, specifically 18 out of the 53 benchmarks analyzed, the performance on ImageNet is poorly or negatively correlated. This is illustrated in Appendix Figure 12, which provides a detailed comparison of benchmark performances. This finding suggests that success on ImageNet does not necessarily translate to proficiency in all visual tasks.

### A.6 A Practical Subset of Benchmarks

While ideally, evaluating VLMs across all 53 benchmarks would provide the most comprehensive insights, the computational demands and complexity of parsing such extensive data can be overwhelming (6 million images to evaluate; 2+ hours for one model on an A100 GPU). To streamline evaluation, we distill the full set of benchmarks in UniBench into seven benchmark types and 17 capabilities. These categorizations are based on benchmarks that correlate strongly with other benchmarks within each benchmark type and capability (Tables 3 and 4).

### A.7 Weighted Average Performance

To account for the varying difficulties across tasks, we compute the weighted average performance of each model by normalizing their scores relative to the performance of CLIP B/32. We use CLIP B/32 as a baseline because its performance effectively captures the inherent complexity of each task, serving as a proxy for task difficulty.

Figure 13 illustrates the normalization results in lower overall performance scores for all models. However, it does not affect the relative rankings among them. This consistency suggests that while task difficulty impacts absolute performance metrics, the comparative effectiveness of the models remains stable across different levels of task complexity.

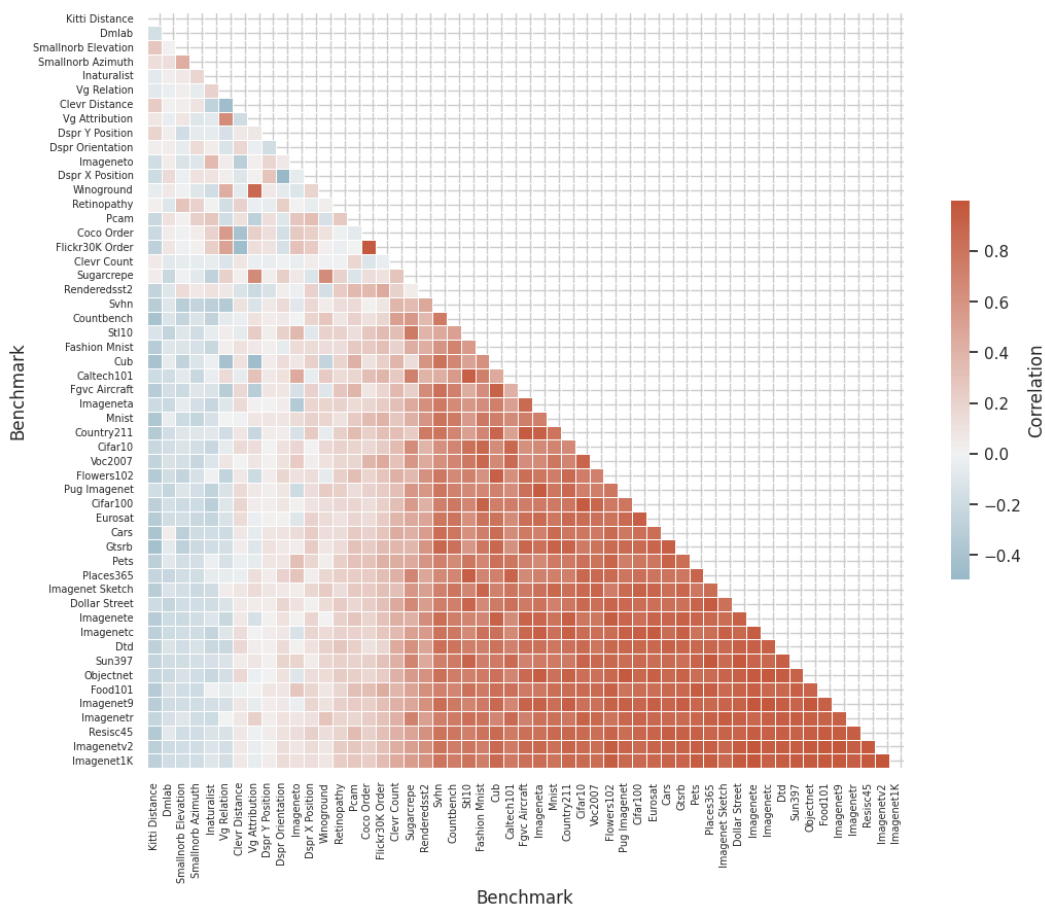

Figure 12: Correlation matrix of models' performance across all benchmarks.

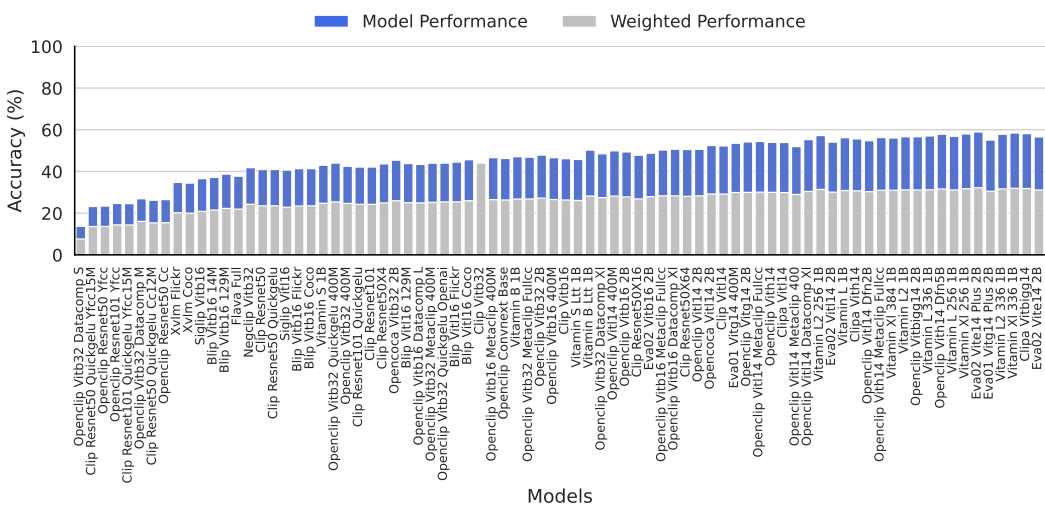

Figure 13: **Weighted Average Performance** for each model using CLIP B/32 as the baseline model performance (as a proxy for task difficulty)

| Benchmark Type       | Most Correlated Benchmark | Correlation Value |
|----------------------|---------------------------|-------------------|
| Object recognition   | ImageNet-1k               | 0.82              |
| Reasoning (Counting) | CountBench                | 0.76              |
| Reasoning (Spatial)  | DSPR Position             | 0.29              |
| Relation             | VG Attribution            | 0.57              |
| Texture              | DTD                       | 1                 |
| Non-Natural Images   | Resisc45                  | 0.72              |
| Robustness           | ImageNet-v2               | 0.81              |
| Corruption           | ImageNet-c                | 1                 |

Table 3: **Evaluate on a curated list of benchmark types, rather than the full set, to save time.** The list includes benchmarks that correlate strongly with other benchmarks for each benchmark type.

| Capabilities                | Most Correlated Benchmark | Correlation Value |
|-----------------------------|---------------------------|-------------------|
| standard object recognition | food101                   | 0.85              |
| counting                    | countbench                | 0.76              |
| spatial understanding       | dspr y position           | 0.29              |
| relations                   | vg attribution            | 0.57              |
| geographic diversity        | dollar street             | 0.89              |
| specifies classification    | flowers102                | 0.7               |
| depth estimation            | dmlab                     | 0.42              |
| pose detection              | smallnorb azimuth         | 0.57              |
| texture detection           | dtd                       | 1                 |
| satellite                   | eurosat                   | 0.95              |
| character recognition       | mnist                     | 0.88              |
| imagenet                    | imagenet1k                | 1                 |
| natural transformations     | imagenet9                 | 0.99              |
| rendition                   | imagenetr                 | 0.97              |
| challenging imagenet        | imagenetv2                | 0.65              |
| corruption                  | imagenetc                 | 1                 |
| medical                     | retinopathy               | 0.64              |
| scene recognition           | sun397                    | 0.99              |

Table 4: **Evaluate on a curated list of capabilities, rather than the full set, to save time.** The list includes benchmarks that correlate strongly with other benchmarks for each capability.

| Benchmark Type              | Mean Performance | Top               |             | Top vs Worst Scale    |            | Worst       |                   |
|-----------------------------|------------------|-------------------|-------------|-----------------------|------------|-------------|-------------------|
|                             |                  | Model             | Performance | Training Dataset Size | Model Size | Performance | Model             |
| Challenging Imagenet        | 47.8             | EVA02 ViT E 14    | 64.4        | 153                   | 50         | 5.0         | DataComp ViT B 32 |
| Character Recognition       | 54.8             | CLIPA ViT G 14    | 74.3        | 85                    | 48         | 20.5        | OpenCLIP ResNet50 |
| Corruption                  | 46.1             | EVA02 ViT E 14    | 74.3        | 153                   | 50         | 2.3         | DataComp ViT B 32 |
| Counting                    | 31.4             | OpenCOCA ViT L 14 | 53.1        | 153                   | 3          | 11.5        | DataComp ViT B 32 |
| Depth Estimation            | 20.4             | DataComp ViT B 16 | 27.6        | 0.6                   | 0.1        | 12.4        | OpenCLIP ViT H 14 |
| Geographic Diversity        | 33.8             | CLIPA ViT G 14    | 46.8        | 98                    | 21         | 5.3         | DataComp ViT B 32 |
| Imagenet                    | 65.7             | OpenCLIP ViT H 14 | 83.1        | 384                   | 7          | 3.9         | DataComp ViT B 32 |
| Medical                     | 43.3             | MetaCLIP ViT L 14 | 68.6        | 0.3                   | 3          | 26.8        | DataComp ViT B 16 |
| Natural Transformations     | 56.2             | CLIPA ViT G 14    | 81.7        | 98                    | 21         | 2.5         | DataComp ViT B 32 |
| Pose Detection              | 3.9              | OpenCLIP ViT B 32 | 4.7         | 5                     | 0.9        | 3.3         | OpenCLIP ConvNext |
| Relations                   | 46.7             | NegCLIP ViT B 32  | 66.7        | 30                    | 1          | 33.2        | DataComp ViT B 32 |
| Rendition                   | 63.7             | CLIPA ViT G 14    | 84.2        | 98                    | 21         | 3.8         | DataComp ViT B 32 |
| Satellite                   | 55.2             | EVA02 ViT E 14    | 75.7        | 153                   | 50         | 12.3        | DataComp ViT B 32 |
| Scene Recognition           | 53.0             | OpenCLIP ViT H 14 | 61.7        | 384                   | 7          | 6.3         | DataComp ViT B 32 |
| Spatial Understanding       | 9.1              | MetaCLIP ViT L 14 | 11.3        | 1                     | 3          | 6.3         | CLIP ResNet50x4   |
| Specifies Classification    | 51.7             | OpenCLIP ViT H 14 | 68.9        | 384                   | 7          | 2.8         | DataComp ViT B 32 |
| Standard Object Recognition | 60.0             | CLIPA ViT G 14    | 77.1        | 98                    | 21         | 13.8        | DataComp ViT B 32 |
| Texture Detection           | 53.4             | MetaCLIP ViT H 14 | 72.4        | 192                   | 7          | 5.3         | DataComp ViT B 32 |
| Overall                     | 44.2             | EVA02 ViT E 14    | 58.0        | 153                   | 50         | 11.3        | DataComp ViT B 32 |

Table 5: List of all evaluated capabilities with their corresponding mean performance across models, the best and the worst performing models. The Top vs. Worst Scale shows the proportion difference between the worst and best model on the training dataset size and the model size.



| Model                                                       | Dataset size | Model size | Learning objective    | Architecture | Model name         |
|-------------------------------------------------------------|--------------|------------|-----------------------|--------------|--------------------|
| blip_vitB16_14m Li et al. [2022a]                           | 14           | 86         | BLIP                  | vit          | BLIP ViT B 16      |
| blip_vitL16_129m Li et al. [2022a]                          | 129          | 307        | BLIP                  | vit          | BLIP ViT L 16      |
| blip_vitB16_129m Li et al. [2022a]                          | 129          | 86         | BLIP                  | vit          | BLIP ViT B 16      |
| blip_vitB16_coco Li et al. [2022a]                          | 129          | 86         | BLIP                  | vit          | BLIP ViT B 16      |
| blip_vitB16_flickr Li et al. [2022a]                        | 129          | 86         | BLIP                  | vit          | BLIP ViT B 16      |
| blip_vitL16_coco Li et al. [2022a]                          | 129          | 307        | BLIP                  | vit          | BLIP ViT L 16      |
| blip_vitL16_flickr Li et al. [2022a]                        | 129          | 307        | BLIP                  | vit          | BLIP ViT L 16      |
| eva02_vitE14_plus_2b Fang et al. [2023b]                    | 2000         | 4350       | Pure Contrastive      | vit          | EVA02 ViT E 14     |
| eva02_vitE14_2b Fang et al. [2023b]                         | 2000         | 4350       | Pure Contrastive      | vit          | EVA02 ViT E 14     |
| eva02_vitL14_2b Fang et al. [2023b]                         | 2000         | 307        | Pure Contrastive      | vit          | EVA02 ViT L 14     |
| eva02_vitB16_2b Fang et al. [2023b]                         | 2000         | 86         | Pure Contrastive      | vit          | EVA02 ViT B 16     |
| eva01_vitG14_plus_2b Fang et al. [2022]                     | 2000         | 1011       | Pure Contrastive      | vit          | EVA01 ViT g 14     |
| eva01_vitG14_400m Fang et al. [2022]                        | 400          | 1011       | Pure Contrastive      | vit          | EVA01 ViT g 14     |
| clipa_vitbigG14 Li et al. [2023b]                           | 1280         | 1843       | Pure Contrastive      | vit          | CLIPA ViT G 14     |
| clipa_vitH14 Li et al. [2023b]                              | 1280         | 633        | Pure Contrastive      | vit          | CLIPA ViT H 14     |
| clipa_vitL14 Li et al. [2023b]                              | 1280         | 307        | Pure Contrastive      | vit          | CLIPA ViT L 14     |
| siglip_vitL16 Zhai et al. [2023]                            | 10000        | 307        | Contrastive (sigmoid) | vit          | SigLIP ViT L 16    |
| siglip_vitB16 Zhai et al. [2023]                            | 10000        | 86         | Contrastive (sigmoid) | vit          | SigLIP ViT B 16    |
| openclip_vitB32_metaclip_fullcc Xu et al. [2023]            | 2500         | 86         | Pure Contrastive      | vit          | MetaCLIP ViT B 32  |
| openclip_vitB16_metaclip_400m Xu et al. [2023]              | 400          | 86         | Pure Contrastive      | vit          | MetaCLIP ViT B 16  |
| openclip_vitB32_metaclip_400m Xu et al. [2023]              | 400          | 86         | Pure Contrastive      | vit          | MetaCLIP ViT B 32  |
| openclip_vitB16_metaclip_fullcc Xu et al. [2023]            | 2500         | 86         | Pure Contrastive      | vit          | MetaCLIP ViT B 16  |
| openclip_vitL14_dfn2b Fang et al. [2023a]                   | 2000         | 307        | Pure Contrastive      | vit          | OpenCLIP ViT L 14  |
| openclip_vitL14_metaclip_400 Xu et al. [2023]               | 400          | 307        | Pure Contrastive      | vit          | MetaCLIP ViT L 14  |
| openclip_vitL14_metaclip_fullcc Xu et al. [2023]            | 2500         | 307        | Pure Contrastive      | vit          | MetaCLIP ViT L 14  |
| openclip_vitH14_metaclip_fullcc Xu et al. [2023]            | 2500         | 633        | Pure Contrastive      | vit          | MetaCLIP ViT H 14  |
| openclip_vitH14_dfn5b Fang et al. [2023a]                   | 5000         | 633        | Pure Contrastive      | vit          | OpenCLIP ViT H 14  |
| openclip_convnext_base Ilharco et al. [2021]                | 400          | 88         | Pure Contrastive      | conv         | OpenCLIP ConvNext  |
| openclip_vitB32_datacomp_s Gadre et al. [2023b]             | 13           | 86         | Pure Contrastive      | vit          | DataComp ViT B 32  |
| openclip_vitB32_datacomp_m Gadre et al. [2023b]             | 128          | 86         | Pure Contrastive      | vit          | DataComp ViT B 32  |
| openclip_vitB32_datacomp_xl Gadre et al. [2023b]            | 12800        | 86         | Pure Contrastive      | vit          | DataComp ViT B 32  |
| openclip_vitB16_datacomp_xl Gadre et al. [2023b]            | 12800        | 86         | Pure Contrastive      | vit          | DataComp ViT B 16  |
| openclip_vitB16_datacomp_1 Gadre et al. [2023b]             | 1280         | 86         | Pure Contrastive      | vit          | DataComp ViT B 16  |
| openclip_vitH14 Ilharco et al. [2021]                       | 2000         | 633        | Pure Contrastive      | vit          | OpenCLIP ViT H 14  |
| xvfm_flickr Zeng et al. [2022]                              | 16           | 86         | XVLM                  | Swin         | XVLM Swin B        |
| flava_full Singh et al. [2022a]                             | 70           | 86         | Other                 | vit          | FLAVA ViT B 32     |
| openclip_vitL14_400m Ilharco et al. [2021]                  | 400          | 307        | Pure Contrastive      | vit          | OpenCLIP ViT L 14  |
| openclip_vitL14_datacomp_xl Gadre et al. [2023b]            | 12800        | 307        | Pure Contrastive      | vit          | DataComp ViT L 14  |
| openclip_vitL14_2b Ilharco et al. [2021]                    | 2000         | 307        | Pure Contrastive      | vit          | OpenCLIP ViT L 14  |
| clip_vitL14 Radford et al. [2021b]                          | 400          | 307        | Pure Contrastive      | vit          | CLIP ViT L 14      |
| xvfm_coco Zeng et al. [2022]                                | 16           | 86         | XVLM                  | Swin         | XVLM Swin B        |
| openclip_vitB32_400m Ilharco et al. [2021]                  | 400          | 86         | Pure Contrastive      | vit          | OpenCLIP ViT B 32  |
| openclip_vitB32_2b Ilharco et al. [2021]                    | 2000         | 86         | Pure Contrastive      | vit          | OpenCLIP ViT B 32  |
| openclip_vitG14_2b Ilharco et al. [2021]                    | 2000         | 1011       | Pure Contrastive      | vit          | OpenCLIP ViT g 14  |
| openclip_vitbigG14_2b Ilharco et al. [2021]                 | 2000         | 1843       | Pure Contrastive      | vit          | OpenCLIP ViT G 14  |
| openclip_vitB16_2b Ilharco et al. [2021]                    | 2000         | 86         | Pure Contrastive      | vit          | OpenCLIP ViT B 16  |
| openclip_vitB16_400m Ilharco et al. [2021]                  | 400          | 86         | Pure Contrastive      | vit          | OpenCLIP ViT B 16  |
| opencoca_vitL14_2b Yu et al. [2022a], Ilharco et al. [2021] | 2000         | 307        | Other                 | vit          | OpenCOCA ViT L 14  |
| opencoca_vitB32_2b Yu et al. [2022a], Ilharco et al. [2021] | 2000         | 86         | Other                 | vit          | OpenCOCA ViT B 32  |
| negclip_vitB32 Yuksekgonul et al. [2023]                    | 400          | 86         | Negative CLIP         | vit          | NegCLIP ViT B 32   |
| clip_vitB16 Radford et al. [2021b]                          | 400          | 86         | Pure Contrastive      | vit          | CLIP ViT B 16      |
| clip_resnet50 Radford et al. [2021b]                        | 400          | 38         | Pure Contrastive      | conv         | CLIP ResNet50      |
| openclip_resnet101_yfcc Ilharco et al. [2021]               | 15           | 56         | Pure Contrastive      | conv         | OpenCLIP ResNet101 |
| openclip_resnet50_yfcc Ilharco et al. [2021]                | 15           | 38         | Pure Contrastive      | conv         | OpenCLIP ResNet50  |
| openclip_resnet50_cc Ilharco et al. [2021]                  | 12           | 38         | Pure Contrastive      | conv         | OpenCLIP ResNet50  |
| clip_resnet101 Radford et al. [2021b]                       | 400          | 56         | Pure Contrastive      | conv         | CLIP ResNet101     |
| clip_resnet50x4 Radford et al. [2021b]                      | 400          | 87         | Pure Contrastive      | conv         | CLIP ResNet50x4    |
| clip_resnet50x16 Radford et al. [2021b]                     | 400          | 167        | Pure Contrastive      | conv         | CLIP ResNet50x16   |
| clip_resnet50x64 Radford et al. [2021b]                     | 400          | 420        | Pure Contrastive      | conv         | CLIP ResNet50x64   |
| clip_vitB32 Radford et al. [2021b]                          | 400          | 86         | Pure Contrastive      | vit          | CLIP ViT B 32      |

Table 6: List of all the models used in evaluations with their corresponding dataset size, model size (number of parameters), learning objective, and architecture.

| Benchmark                                  | Measure   | Benchmark Type     | Capability                  | Curated | Object Centric | Number of Classes |
|--------------------------------------------|-----------|--------------------|-----------------------------|---------|----------------|-------------------|
| caltech101 [Fei-Fei et al., 2004]          | zero-shot | object recognition | standard object recognition | False   | True           | 102               |
| cars [Krause et al., 2013]                 | zero-shot | object recognition | standard object recognition | False   | True           | 196               |
| cifar10 [Krizhevsky et al., 2009]          | zero-shot | object recognition | standard object recognition | False   | True           | 10                |
| cifar100 [Krizhevsky et al., 2009]         | zero-shot | object recognition | standard object recognition | False   | True           | 100               |
| clevr count [Johnson et al., 2017]         | zero-shot | reasoning          | counting                    | True    | False          | 8                 |
| clevr distance [Johnson et al., 2017]      | zero-shot | reasoning          | spatial understanding       | True    | False          | 6                 |
| coco order [Yuksekgonul et al., 2023]      | relation  | relation           | relations                   | False   | False          | 5                 |
| countbench [Paiss et al., 2023]            | zero-shot | reasoning          | counting                    | False   | False          | 10                |
| country211 [Radford et al., 2021a]         | zero-shot | object recognition | geographic diversity        | False   | False          | 211               |
| cub [Wah et al., 2011]                     | zero-shot | object recognition | specifics classification    | False   | False          | 200               |
| dmlab [Zhai et al., 2019]                  | zero-shot | reasoning          | depth estimation            | True    | False          | 6                 |
| dollar street [Gaviria Rojas et al., 2022] | zero-shot | object recognition | geographic diversity        | False   | True           | 60                |
| dspr orientation [Matthey et al., 2017]    | zero-shot | reasoning          | pose detection              | True    | False          | 40                |
| dspr x position [Matthey et al., 2017]     | zero-shot | reasoning          | spatial understanding       | True    | False          | 32                |
| dspr y position [Matthey et al., 2017]     | zero-shot | reasoning          | spatial understanding       | True    | False          | 32                |
| dtd [Cimpoi et al., 2014]                  | zero-shot | texture            | texture detection           | True    | False          | 47                |
| eurosat [Helber et al., 2019, 2018]        | zero-shot | non-natural images | satellite                   | False   | False          | 10                |
| fashion mnist [Xiao et al., 2017]          | zero-shot | object recognition | character recognition       | True    | True           | 10                |
| fgvc aircraft [Maji et al., 2013]          | zero-shot | object recognition | standard object recognition | False   | True           | 100               |
| flickr30k order [Yuksekgonul et al., 2023] | relation  | relation           | relations                   | False   | False          | 5                 |
| flowers102 [Nilsback and Zisserman, 2008]  | zero-shot | object recognition | specifics classification    | False   | True           | 102               |
| food101 [Bossard et al., 2014]             | zero-shot | object recognition | standard object recognition | False   | True           | 101               |
| gtsrb [Stallkamp et al., 2012]             | zero-shot | object recognition | standard object recognition | False   | True           | 43                |
| imagenet1k [Deng et al., 2009]             | zero-shot | object recognition | imagenet                    | False   | True           | 1000              |
| imagenet9[Xiao et al., 2020]               | zero-shot | robustness         | natural transformations     | True    | True           | 1000              |
| imagenet sketch [Wang et al., 2019]        | zero-shot | non-natural images | rendition                   | True    | True           | 1000              |
| imageneta [Hendrycks et al., 2021b]        | zero-shot | robustness         | challenging imagenet        | True    | True           | 200               |
| imagenetc [Hendrycks and Dietterich, 2019] | zero-shot | corruption         | corruption                  | True    | True           | 1000              |
| imagenete [Li et al., 2023c]               | zero-shot | robustness         | natural transformations     | True    | True           | 1000              |
| imageneto [Hendrycks et al., 2021b]        | zero-shot | robustness         | challenging imagenet        | True    | True           | 200               |
| imagenetr [Hendrycks et al., 2021a]        | zero-shot | non-natural images | rendition                   | True    | True           | 200               |
| imagenetv2 [Recht et al., 2019]            | zero-shot | robustness         | challenging imagenet        | True    | True           | 1000              |
| inaturalist [Van Horn et al., 2018]        | zero-shot | object recognition | specifics classification    | False   | True           | 5089              |
| kitti distance [Geiger et al., 2012]       | zero-shot | reasoning          | depth estimation            | False   | False          | 4                 |
| mnist[LeCun et al., 1998]                  | zero-shot | object recognition | character recognition       | True    | True           | 10                |
| objectnet [Barbu et al., 2019]             | zero-shot | robustness         | natural transformations     | False   | True           | 113               |
| pcam [Veeling et al., 2018]                | zero-shot | non-natural images | medical                     | True    | False          | 2                 |
| pets [Parkhi et al., 2012]                 | zero-shot | object recognition | specifics classification    | False   | True           | 37                |
| places365 [Zhou et al., 2017]              | zero-shot | object recognition | scene recognition           | False   | False          | 365               |
| pug imagenet [Bordes et al., 2023]         | zero-shot | object recognition | standard object recognition | False   | True           | 151               |
| rendereds2 [Radford et al., 2021a]         | zero-shot | object recognition | character recognition       | True    | True           | 2                 |
| resisc45[Cheng et al., 2017]               | zero-shot | non-natural images | satellite                   | False   | False          | 45                |
| retinopathy [Wang and Yang, 2018]          | zero-shot | non-natural images | medical                     | False   | False          | 5                 |
| smallnorb azimuth [LeCun et al., 2004]     | zero-shot | reasoning          | pose detection              | True    | False          | 18                |
| smallnorb elevation [LeCun et al., 2004]   | zero-shot | reasoning          | spatial understanding       | True    | False          | 9                 |
| stl10 [Coates et al., 2011]                | zero-shot | object recognition | standard object recognition | False   | True           | 10                |
| sugarcrepe [Hsieh et al., 2024]            | relation  | relation           | relations                   | False   | False          | 2                 |
| sun397 [Xiao et al., 2010]                 | zero-shot | object recognition | scene recognition           | False   | False          | 397               |
| svhn [Netzer et al., 2011]                 | zero-shot | object recognition | character recognition       | False   | True           | 10                |
| vg attribution [Yuksekgonul et al., 2023]  | relation  | relation           | relations                   | False   | False          | 2                 |
| vg relation [Yuksekgonul et al., 2023]     | relation  | relation           | relations                   | False   | False          | 2                 |
| voc2007 [Everingham et al.]                | zero-shot | object recognition | standard object recognition | False   | True           | 20                |
| winground [Thrush et al., 2022a]           | relation  | relation           | relations                   | False   | False          | 2                 |

Table 7: List of all the benchmarks used in evaluations with their corresponding dataset type, capability, number of classes, whether they are curated and whether they are curated object centric.
